# Supplementary material
Source: Royal Society of Chemistry journal article supplement (doi:10.1039/d6mh00971a)
Supplement: d6mh00971a1.pdf [file d6mh00971a1.pdf]

## Supporting Information

In situ construction of all-solid-state Z-scheme g-C<sub>3</sub>N<sub>4</sub>/ZnNCN/ZnO with  
carbodiimide bridges for superior photocatalytic H<sub>2</sub>O<sub>2</sub> production

Fangting Zhang,<sup>a</sup> Zhihao Zhang,<sup>a</sup> Yeshuai Yao,<sup>a</sup> Baoxiu Mi,<sup>a</sup> Zhiqiang Gao,<sup>a</sup> Dapeng  
Cao,<sup>\*a</sup> Guihua Hang<sup>\*b</sup>

<sup>a</sup> State Key Laboratory of Flexible Electronics (LoFE) & Institute of Advanced  
Materials (IAM), Nanjing University of Posts & Telecommunications, 9 Wenyuan  
Road, Nanjing 210023, China.

<sup>b</sup> Department of Pharmacy, Taizhou Second People's Hospital Affiliated to Yangzhou  
University, Taizhou, Jiangsu 225500, China.

### **\*Corresponding Authors**

Dapeng Cao – State Key Laboratory of Flexible Electronics (LoFE) & Institute of  
Advanced Materials (IAM), Nanjing University of Posts & Telecommunications, 9  
Wenyuan Road, Nanjing 210023, China; E-mail: iamdpcao@njupt.edu.cn

Guihua Hang – Department of Pharmacy, Taizhou Second People's Hospital  
Affiliated to Yangzhou University, Taizhou, Jiangsu 225500, China; E-mail:  
416955400@qq.com

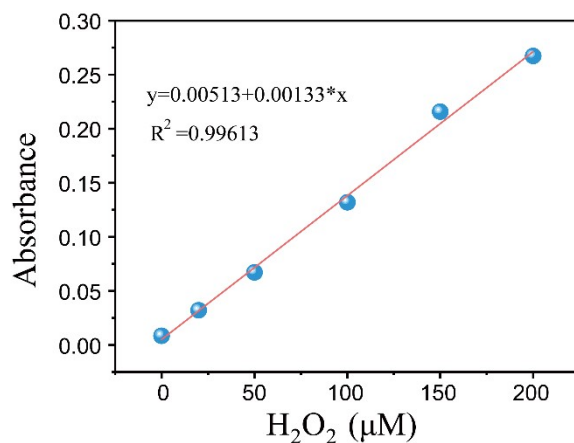

Fig. S1. Standard curve for the determination of H<sub>2</sub>O<sub>2</sub> concentration by the DPD-POD.

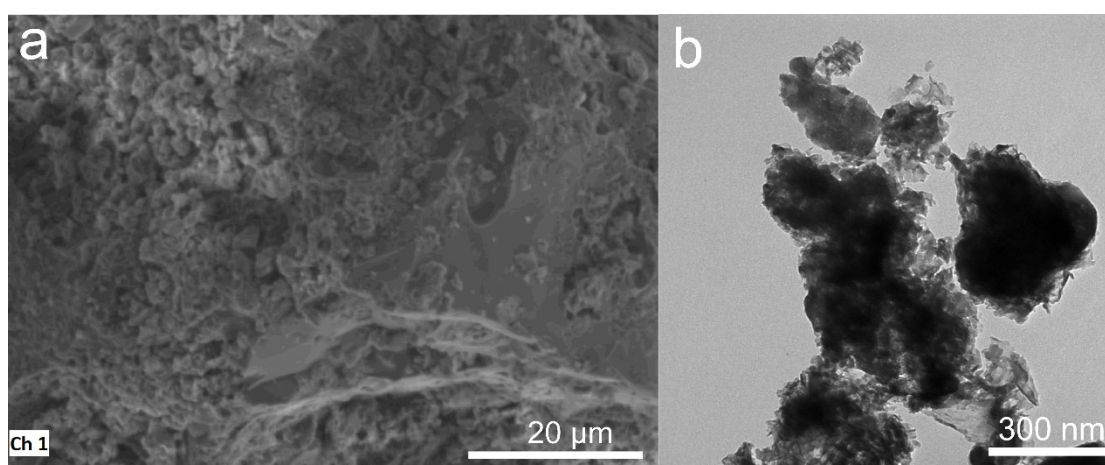

Fig. S2. (a) SEM and (b) TEM images of 1.25-ZnO.

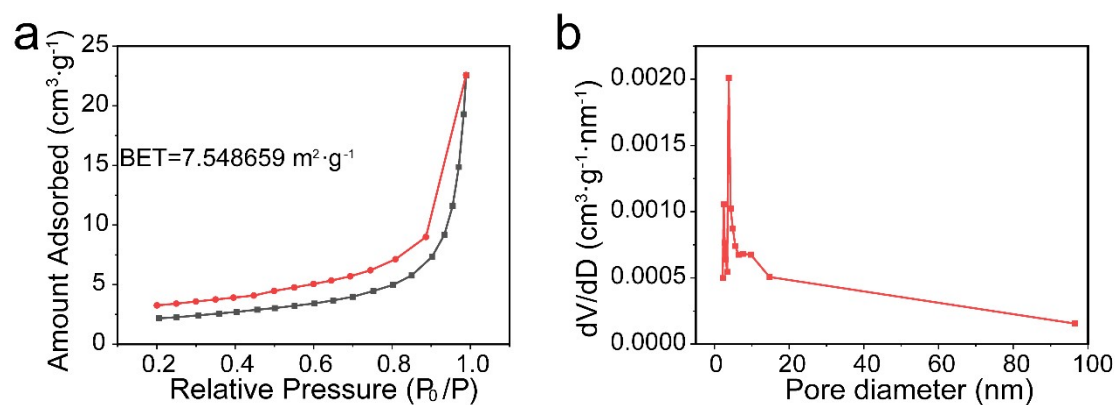

Fig. S3. (a) Nitrogen adsorption-desorption isotherms and (b) pore size distributions of 1.25-ZnO.

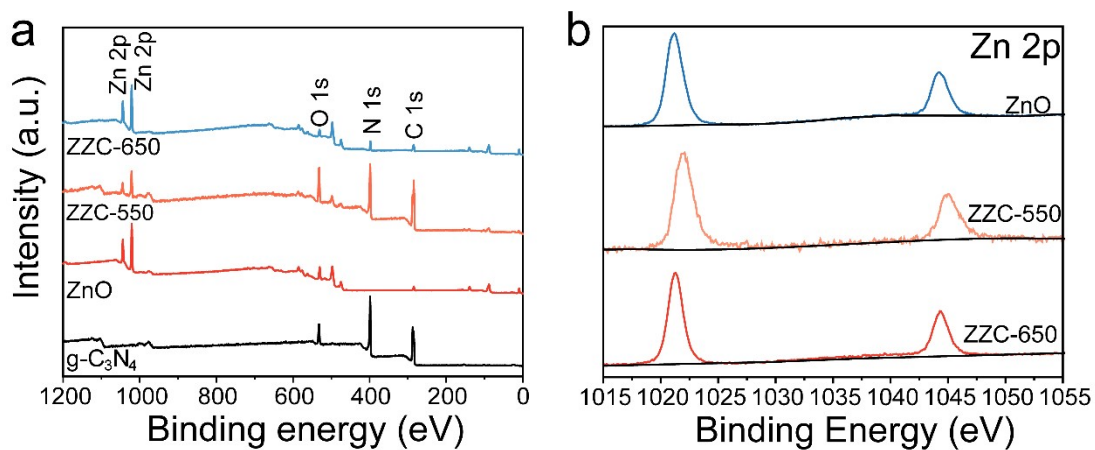

Fig. S4. Survey XPS spectra of 1.25-ZZC.

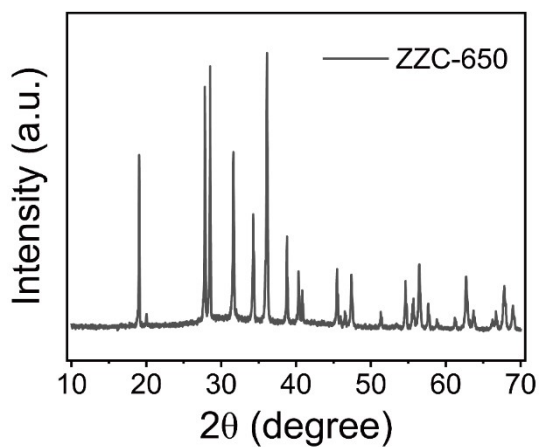

Fig. S5. XRD patterns of ZZC-650.

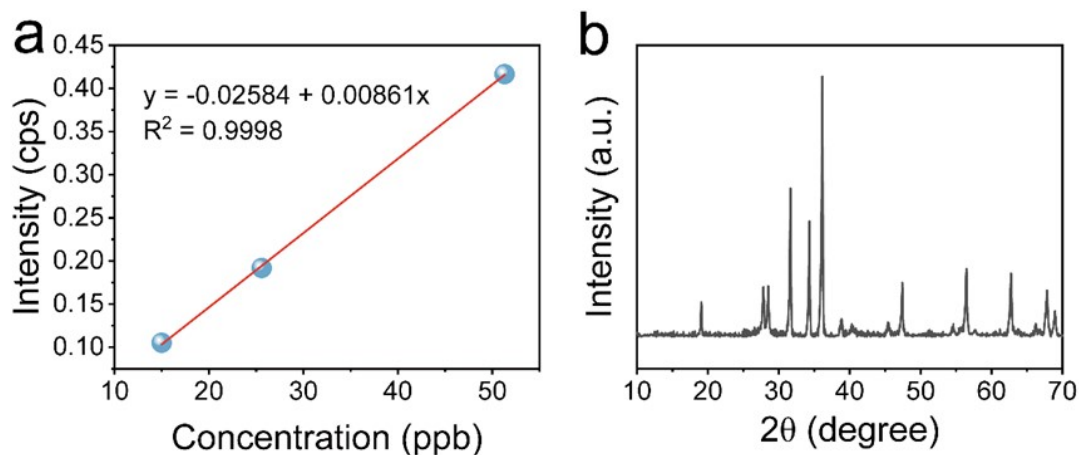

Fig. S6 Standard curve for the determination of Zn concentration by the ICP-MS (a) and XRD pattern (b) of 1.25-ZZC.

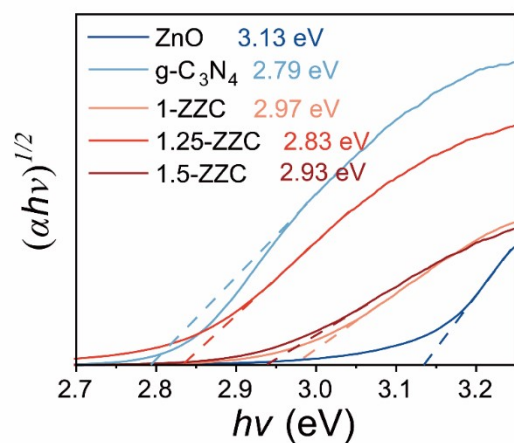

Fig. S7. Tauc plots of various catalysts.

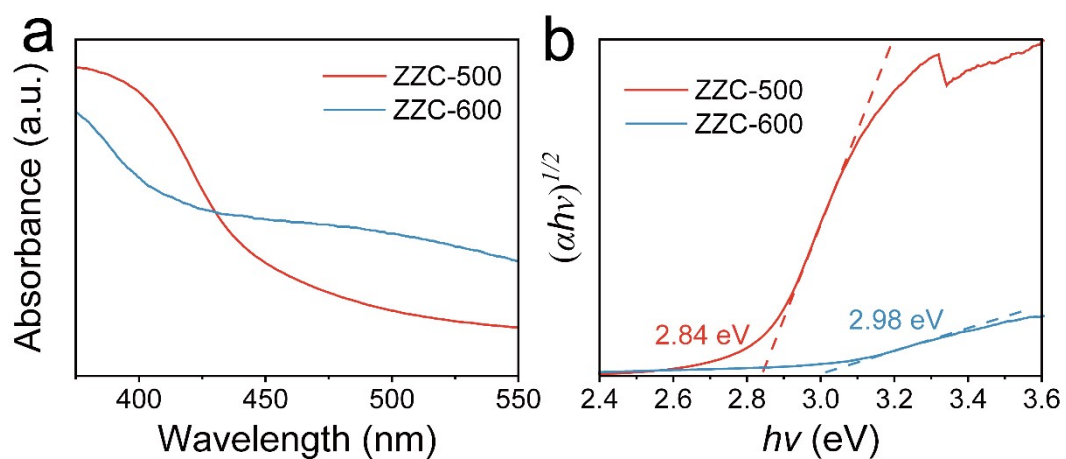

Fig. S8. UV-vis diffuse reflection spectra (a) and Tauc plots (b) of ZZC-500 and ZZC-600.

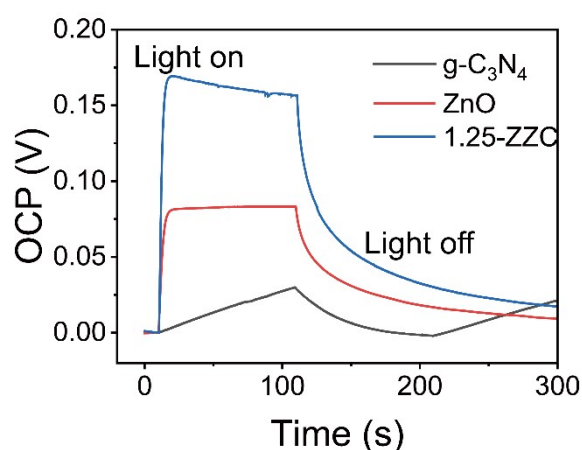

Fig. S9 The OCP of g-C<sub>3</sub>N<sub>4</sub>, ZnO and 1.25-ZZC.

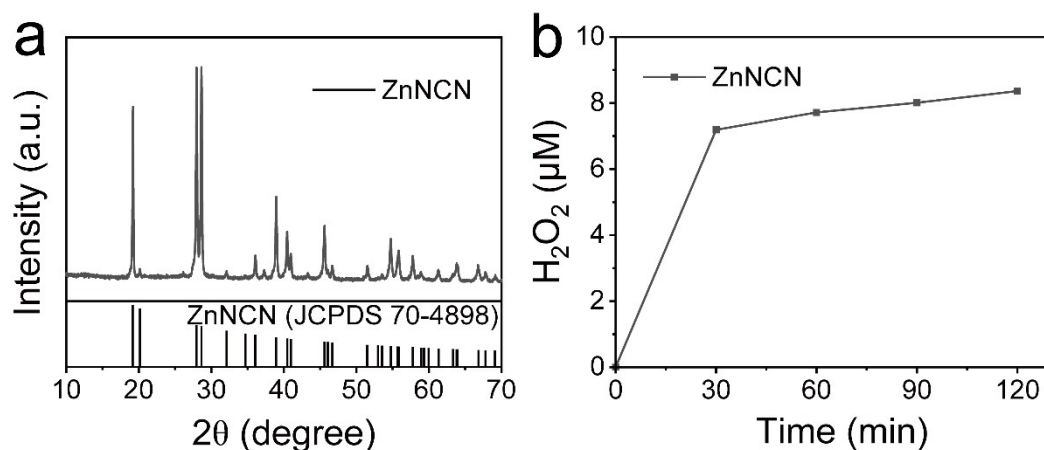

Fig. S10. XRD patterns (a) and H<sub>2</sub>O<sub>2</sub> productivity (b) of ZCC-650 (0.5 g L<sup>-1</sup> catalyst, 4 vol% sacrificial agent, pH 7)

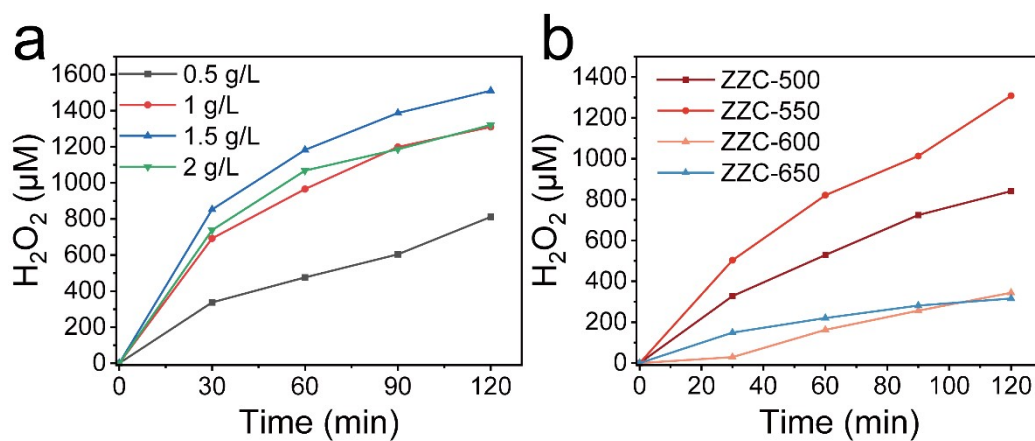

Fig. S11. (a) H<sub>2</sub>O<sub>2</sub> productivity on 1.25-ZCC various catalyst dosages (4 vol% sacrificial agent, pH 7). (b) H<sub>2</sub>O<sub>2</sub> productivity (4 vol% sacrificial agent, pH 7) of ZCC.

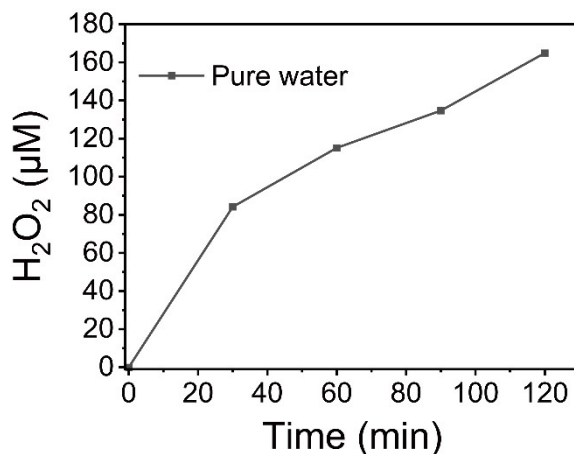

Fig. S12. H<sub>2</sub>O<sub>2</sub> productivity on 1.25-ZCC in pure water ((1 g L<sup>-1</sup> catalyst, pH 7).

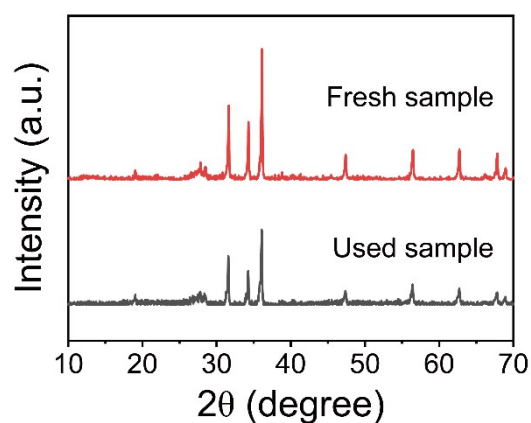

Fig. S13. XRD patterns of 1.25-ZZC before and after cycling tests.

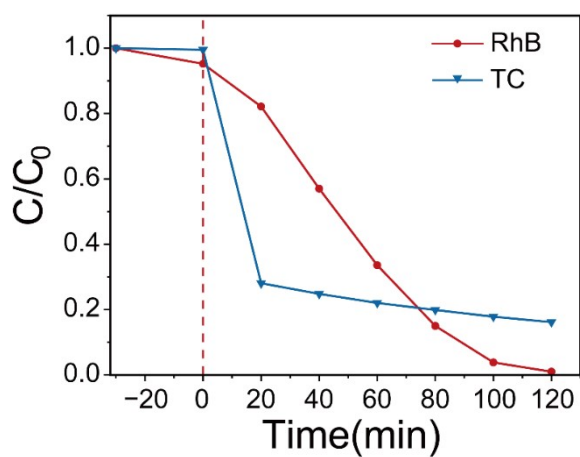

Fig. S14. Degradation behavior of 1.25-ZZC ( $0.5 \text{ g L}^{-1}$  catalyst,  $50 \text{ mg/L}$  RhB, CIP and TC, pH 7).

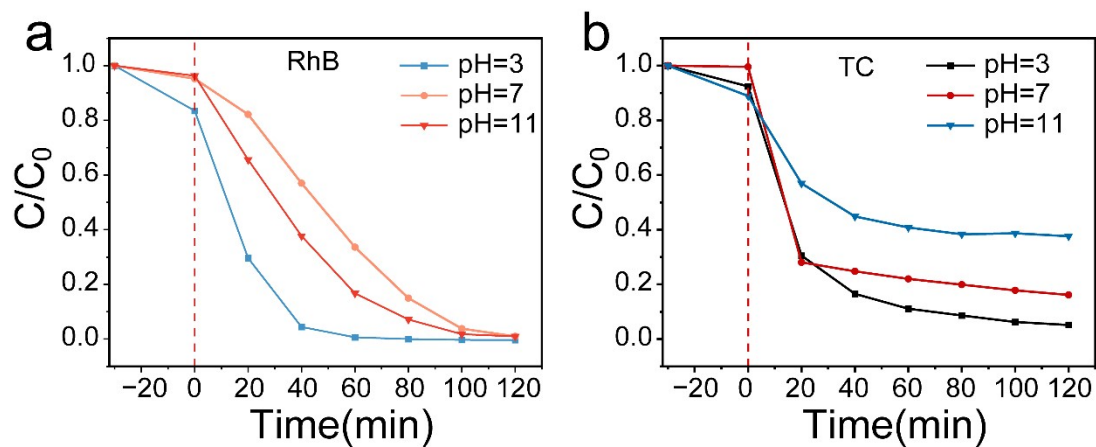

Fig. S15. (a) RhB-degradation and (b) TC-degradation at different pH of 1.25-ZZC (0.5 g L<sup>-1</sup> catalyst, pH 7).

Table S1. Elemental analysis results from EDS for 1.25-ZZC.

| elements | Zn    | O [At. %] | C [At. %] | N [At. %] | Zn/N |
|----------|-------|-----------|-----------|-----------|------|
| [Wt. %]  | 27.27 | 7.87      | 23.49     | 41.37     | 0.66 |
| [At. %]  | 7.17  | 8.45      | 33.61     | 50.77     | 0.14 |

Table S2. Elemental analysis results from XPS for 1.25-ZZC.

| elements | Zn   | O     | C     | N     | Zn/N |
|----------|------|-------|-------|-------|------|
| [Wt. %]  | 7.05 | 10.52 | 50.31 | 32.12 | 0.22 |
| [At. %]  | 1.49 | 9.08  | 57.8  | 31.64 | 0.05 |

Table S3. Comparison of photocatalytic H<sub>2</sub>O<sub>2</sub> production by different catalysts.

| Photocatalyst                                               | Catalyst dosage (mg) | Reaction solution                    | H <sub>2</sub> O <sub>2</sub> yield       | Ref.      |
|-------------------------------------------------------------|----------------------|--------------------------------------|-------------------------------------------|-----------|
| ZCN                                                         | 50                   | 50 mL water/IPA (4% IPA)/Air         | 0.81 mmol·g <sup>-1</sup> h <sup>-1</sup> | This work |
| Trz-CN2                                                     | 50                   | 80 mL water/EDTA (7 mmol/L EDTA)/Air | 0.56 mmol g <sup>-1</sup> h <sup>-1</sup> | 1         |
| IO CN-Cv                                                    | 20                   | 20 mL water/EtOH (5% EtOH)/Air       | 0.06 mmol g <sup>-1</sup> h <sup>-1</sup> | 2         |
| SPCN                                                        | 25                   | 50 mL water/ IPA (10% IPA)/ Air      | 0.32 mmol g <sup>-1</sup> h <sup>-1</sup> | 3         |
| Dual P-doped porous g-C <sub>3</sub> N <sub>4</sub> (PCN-D) | 50                   | 100 mL water/IPA (10% IPA)/Air       | 0.41 mmol·g <sup>-1</sup> h <sup>-1</sup> | 4         |
| M-CNNP                                                      | 30                   | 30 mL water/ EtOH (20% EtOH)/Air     | 0.04 mmol g <sup>-1</sup> h <sup>-1</sup> | 5         |
| Ultra-thin g-C <sub>3</sub> N <sub>4</sub> (DCN)            | 20                   | 50 mL water/IPA (10% IPA)/Air        | 0.65 mmol·g <sup>-1</sup> h <sup>-1</sup> | 6         |
| SP-CN                                                       | 25                   | 30 mL water/IPA (10% EtOH)/Air       | 0.29 mmol g <sup>-1</sup> h <sup>-1</sup> | 7         |
| KOH-doped g-C <sub>3</sub> N <sub>4</sub>                   | 30                   | 30 mL water/IPA (10% IPA)/Air        | 0.13 mmol g <sup>-1</sup> h <sup>-1</sup> | 8         |
| SCN                                                         | 20                   | 40 mL water/IPA (10% IPA)/Air        | 0.7 mmol·g <sup>-1</sup> h <sup>-1</sup>  | 9         |
| N-deficient and B-doped g-C <sub>3</sub> N <sub>4</sub>     | 100                  | 100 mL water/IPA (10% IPA)/Air       | 0.45 mmol g <sup>-1</sup> h <sup>-1</sup> | 10        |
| MCN@CdS                                                     | 40                   | 100 mL water/ EtOH (10% EtOH)/Air    | 0.52 mmol g <sup>-1</sup> h <sup>-1</sup> | 11        |

## References

1. H. Ma, W. Jiang, Y. Ma, Y. Song, L. Pei, H. Ban, S. Zhan and F. Zhou, *Small Methods*, 2025, 9, 2401347.

2. J. Lei, B. Chen, W. Lv, L. Zhou, L. Wang, Y. Liu and J. Zhang, *ACS Sustain. Chem. Eng.*, 2019, 7, 16467-16473.
3. W. Miao, Y. Wang, Y. Liu, H. Qin, C. Chu and S. Mao, *Engineering*, 2023, 25, 214-221.
4. G. Yu, K. Gong, C. Xing, L. Hu, H. Huang, L. Gao, D. Wang and X. Li, *Chem. Eng. J.*, 2023, 461, 142140.
5. W. Liu, C. Song, M. Kou, Y. Wang, Y. Deng, T. Shimada and L. Ye, *Chem. Eng. J.*, 2021, 425, 130615.
6. J. Hu, P. Zhang, T. Yang, Y. Cai, J. Qu and X. Yang, *Appl. Surf. Sci.*, 2022, 576, 151841.
7. Z. Guo, K. Sun, S. Zou, B. Xiong, L. Wang, W. Shi, Y. Sun and F. Guo, *J. Colloid Interface Sci.*, 2025, 699, 138118.
8. H. Zhang, L. Jia, P. Wu, R. Xu, J. He and W. Jiang, *Appl. Surf. Sci.*, 2020, 527, 146584.
9. C. Chu, W. Miao, Q. Li, D. Wang, Y. Liu and S. Mao, *Chem. Eng. J.*, 2022, 428, 132531.
10. J. Luo, C. Fan, L. Tang, Y. Liu, Z. Gong, T. Wu, X. Zhen, C. Feng, H. Feng, L. Wang, L. Xu and M. Yan, *Appl. Catal. B: Environ.*, 2022, 301, 120757.
11. S. Jing, J. Zhao, A. Wang, Q. Ji, R. Cheng, H. Liang, F. Chen, P. Kannan, A. Brouzgou and P. Tsiakaras, *Chem. Eng. J.*, 2024, 479, 147150.
